# Supplementary material for: Core-shell mesoporous silica nanospheres used as Zn2+ ratiometric fluorescent sensor and adsorbent
Source: Royal Society of Chemistry journal article supplement (doi:10.1039/c2ra01106a), 2012-01-01
Supplement: c2ra01106a.pdf [file c2ra01106a.pdf]

## Supporting information

$^1\text{H}$  NMR spectra and  $^{13}\text{C}$  NMR spectra of synthesized compounds

# Core-Shell Mesoporous Silica Nanosphere Used as $\text{Zn}^{2+}$ Ratiometric Fluorescent Sensor and Adsorbent

*Deli Lu, Juying Lei, Zhidan Tian, Lingzhi Wang\* and Jinlong Zhang\**

Key Lab for Advanced Materials and Institute of Fine Chemicals, East China

University of Science and Technology, Shanghai 200237, P. R. China.

E-mail: wlz@ecust.edu.cn and jlzhang@ecust.edu.cn.

Fig. S1  $^1\text{H}$  NMR spectra of compound 2

Fig. S2  $^{13}\text{C}$  NMR spectra of compound 2

Fig. S3  $^1\text{H}$  NMR spectra of compound 3

Fig. S4  $^{13}\text{C}$  NMR spectra of compound 3

Fig. S5  $^1\text{H}$  NMR spectra of compound Rhodamine 101-succinimide

Fig. S6  $^{13}\text{C}$  NMR spectra of compound Rhodamine 101-succinimide

Fig. S7 Fluorescence spectra of R-S-MSN ( $10^{-5}$  M) in EtOH-water solution (30 vol% EtOH) at different pH value (3-12) in the presence of  $10^{-4}$  M  $\text{Zn}^{2+}$ .

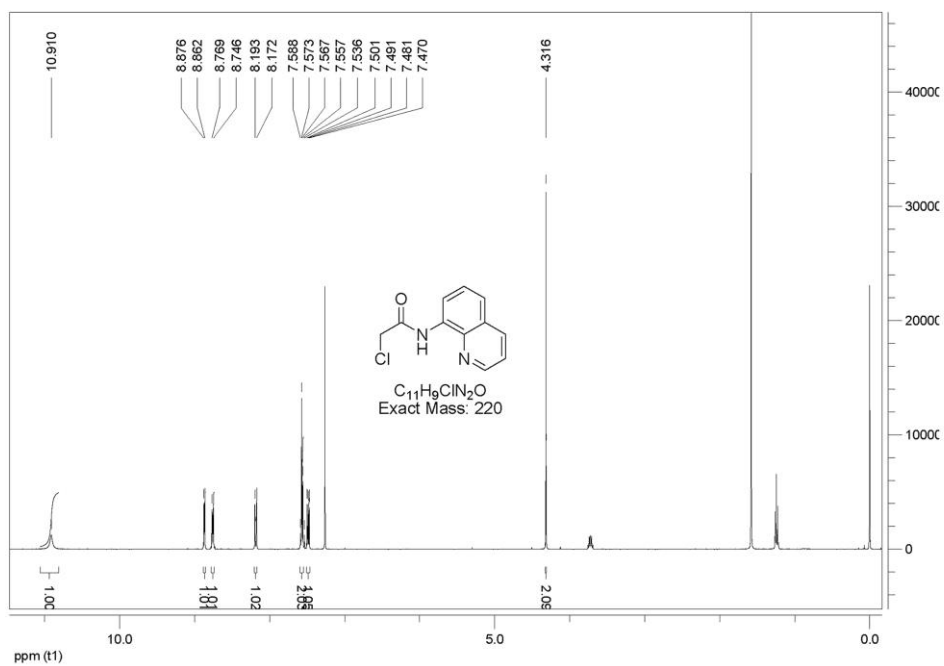

Fig. S1 <sup>1</sup>H NMR spectra of compound 2

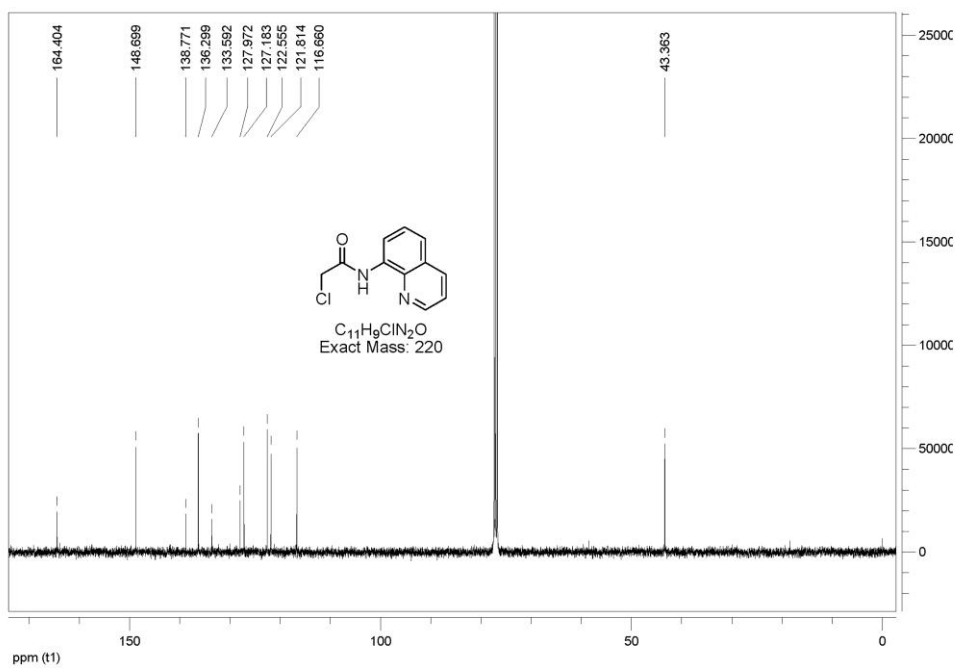

Fig. S2 <sup>13</sup>C NMR spectra of compound 2



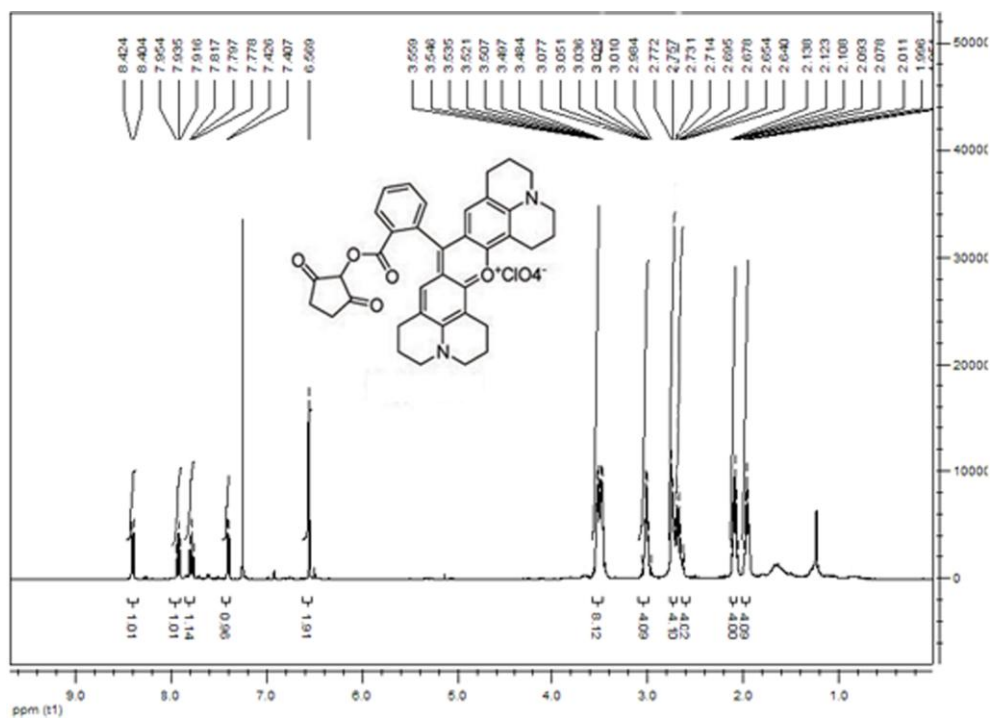

Fig. S5 <sup>1</sup>H NMR spectra of Rhodamine 101-succinimide

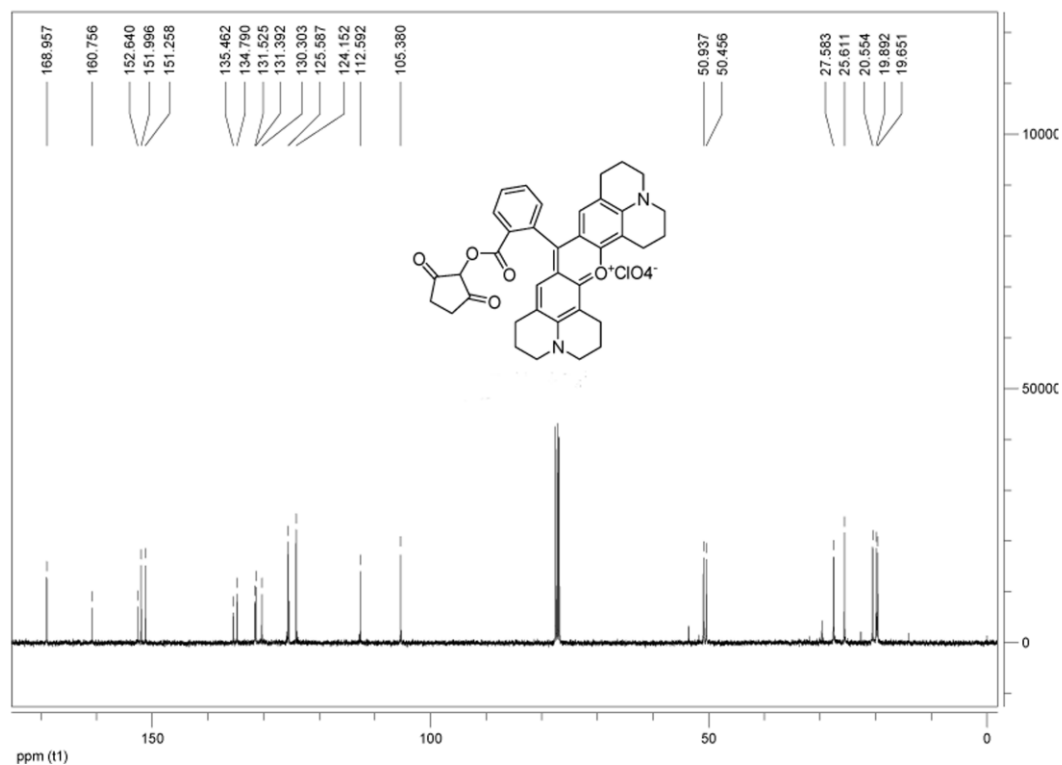

Fig. S6 <sup>13</sup>C NMR spectra of Rhodamine 101-succinimide

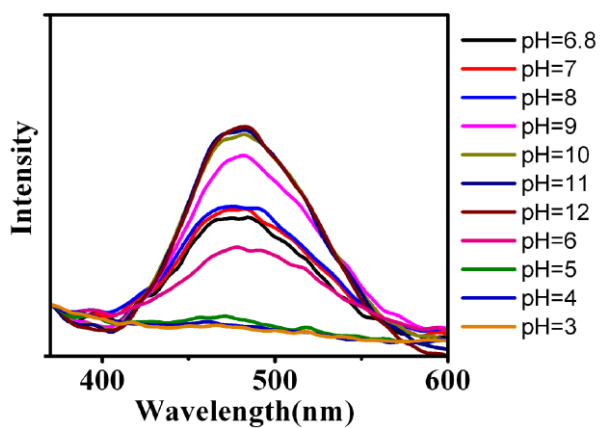

Fig. S7 Fluorescence spectra of R-S-MSN ( $10^{-5}$  M) in EtOH-water solution (30 vol% EtOH) at different pH value (3-12) in the presence of  $10^{-4}$  M  $Zn^{2+}$ .
